# Supplementary material for: Increasing PFAS concentrations in human serum correlate with elevated blood lipid levels
Source: Env Sci Adv. 2026 Feb 16;5(3):885–99. doi: 10.1039/d5va00483g (PMC12921673; doi:10.1039/d5va00483g)
Supplement: VA-005-D5VA00483G-s002 [file VA-005-D5VA00483G-s002.xlsx]

## Sheet: SI_TOC
Increasing PFAS Concentrations in Human Serum Correlate with Elevated Blood Lipid Levels
Ashlee T. Falls1, Anna K. Boatman1, Jack P. Ryan1, Amie M. Solosky1, James N. Dodds1, Jessie R. Chappel3, Allison N. Fry1, Kaylie I. Kirkwood-Donelson4, Heather M. Stapleton2*, Erin S. Baker1*
1Department of Chemistry, University of North Carolina at Chapel Hill, Chapel Hill, NC, 27514
2Nicholas School of the Environment, Duke University, Durham, NC, 27708
3Bioinformatics Research Center, Department of Biological Sciences, North Carolina State University, Raleigh, NC, 27606
4National Institute of Environmental Health Sciences, Durham, NC, 27709
* Correspondence:
Heather M. Stapelton (heather.stapleton@duke.edu) and Erin S. Baker (erinmsb@unc.edu)
Table of Contents
Table S1: List of Chemicals, Reagents, and Equipment
Table S2: LC Gradient for PFAS Suspect Screening Analysis
Table S3: Electrospray Ionization Source Conditions for PFAS Suspect Screening Analysis
Table S4: IMS-MS Settings for PFAS Suspect Screening Analysis
Table S5: LC Gradient for Lipid Analysis
Table S6: Electrospray Ionization Source Conditions for Lipid Analysis
Table S7: CID Collision Energy Ramp Method for Lipid Analysis
Table S8: IMS-MS Settings for Lipid Analysis
Table S9: Quantified PFAS Values
Table S10: Suspect Screening Analysis Surrogate Standards
Table S11: Comparisons of PFAS in Exposed Groups vs NHANES
Table S12: Statistically Significant PFAS Abundance Differences Between Exposed Groups
Table S13: Detected Lipids, Mode, and Ion Type
Table S14: Linear Mixed-Effects Model ANOVA Results
Table S15: Statistically Significant Lipids Between ≥20 and <20 ng/mL PFAS Groups
Table S16: Analysis of Covariates
Table S17: Spearman Correlations Between PFAS and Lipid Abundances
Table S18: Summary of Counts of Lipids by Class that Correlate to PFAS Abundances

## Sheet: Table S1
Table S1: List of Chemicals, Reagents, and Equipment
Item	Size	Manufacturer	Part Number
C18 column (Zorbax Eclipse Plus)	2.1 mm x 50 mm, 1.8 µm	Agilent	959757-902
C18 guard column	2.1 mm x 5 mm, 1.8 µm	Agilent	821725-901
C18 column (Acquity UPLC CSH)	3.0 mm x 150 mm, 1.7 µm	Waters	186005302
ESI Tune Mix Solution	n/a	Agilent	G1969-85000
Isotope-Labeled PFAS Internal Standard Mix	n/a	Wellington Laboratories	MPFAC-HIF-ES
Freeze-Dried Organic Contaminants in Non-Fortified Human Serum	n/a	National Institute of Standards and Technology	Standard Reference Material 1957
Brain Total Lipid Extract (BTLE)	n/a	Avanti Polar Lipids	131101C-100mg

## Sheet: Table S2
Table S2: LC Gradient for PFAS Suspect Screening Analysis
Time (min)	% MPA/% MPB	Flow Rate (mL/min)
0	90/10	0.40
0.5	90/10	0.40
2	70/30	0.40
14	5/95	0.40
14.5	0/100	0.40
16.5	0/100	0.40

## Sheet: Table S3
Table S3: Electrospray Ionization Source Conditions for PFAS Suspect Screening Analysis
Parameter	Value
Gas Temperature	230°C
Drying Gas	11 L/min
Nebulizer	45 psi
Sheath Gas Temperature	350°C
Sheath Gas Flow	11 L/min
Vcap	3500 V
Nozzle Voltage	500 V

## Sheet: Table S4
Table S4: IMS-MS Settings for PFAS Suspect Screening Analysis
Parameter	Value
Mass Range	m/z 50-1700
Trap Fill Time	3900 µs
Trap Release Time	300 µs
Frame Rate	0.9 frames/s
IM Transient Rate	17 IM transients/frame
Max Drift Time	60 ms
TOF Transient Rate	600 transients/IM transients
Multiplexing Pulsing Sequence Length	4 bit
Drift Tube Entrance	-1574 V
Drift Tube Exit	-224 V
Real Funnel Entrance	-217.5 V
Rear Funnel Exit	-45 V

## Sheet: Table S5
Table S5: LC Gradient for Lipid Analysis
Time (min)	% MPA/% MPB	Flow Rate (mL/min)
Elution Gradient
0	60/40	0.25
2	50/50	0.25
3	40/60	0.25
12	30/70	0.25
15	25/75	0.25
17	22/78	0.25
19	15/85	0.25
22	8/92	0.25
25	1/99	0.25
34	1/99	0.25
Column Wash
34.5	60/40	0.30
35	1/99	0.30
35.5	1/99	0.30
36	60/40	0.35
37	60/40	0.30
38	60/40	0.25

## Sheet: Table S6
Table S6: Electrospray Ionization Source Conditions for Lipid Analysis
Parameter	Value
Gas Temperature	300°C
Drying Gas	5 L/min
Nebulizer	35 psi
Sheath Gas Temperature	350°C
Sheath Gas Flow	11 L/min
Vcap	3500 V
Nozzle Voltage	1000 V

## Sheet: Table S7
Table S7: CID Collision Energy Ramp Method for Lipid Analysis
Drift Time (ms)	Collision Energy (V)
0	0
15	14
19	27
25	45
40	52
50	58

## Sheet: Table S8
Table S8: IMS-MS Settings for Lipid Analysis
Parameter	Value
Mass Range	m/z 50-1700
Trap Fill Time	10000 µs
Trap Release Time	400 µs
Frame Rate	0.9 frames/s
IM Transient Rate	17 IM transients/frame
Max Drift Time	60 ms
TOF Transient Rate	600 transients/IM transients
Drift Tube Entrance	-1574 V
Drift Tube Exit	-224 V
Real Funnel Entrance	-217.5 V
Rear Funnel Exit	-45 V

## Sheet: Table S9
Table S9: Quantified PFAS Values
	Firefighter						Drinking Water						Wilcoxon rank-sum test (Bonferroni corrections)
PFAS	Mean (ng/mL)	Standard Deviation (ng/mL)	%RSD	Median (ng/mL) (50th percentile)	25th percentile (ng/mL)	75th percentile (ng/mL)	Mean (ng/mL)	Standard Deviation (ng/mL)	%RSD	Median (ng/mL)	25th percentile (ng/mL)	75th percentile (ng/mL)	p-value
PFBA	0.238621	0.106962	44.8251	0.209172	0.171498	0.288889	0.0259184	0.126983	489.934	0	0	0	*
PFHxA	0	0	NA	0	0	0	0.565714	0.253854	44.8731	0.57	0.49	0.7	*
PFHpA	0.0165517	0.0752271	454.497	0	0	0	0.367143	0.53126	144.701	0	0	0.64	*
PFOA	2.31172	4.83102	208.979	1.43413	1.14736	1.61678	7.9702	6.78499	85.1294	6.17	3.43	9.56	2.73e-13
PFNA	0.187931	0.243066	129.338	0	0	0.332771	1.73286	1.50082	86.6094	1.35	1.04	1.75	3.73e-12
PFDA	0.152759	0.116646	76.36	0.116484	0.103064	0.1485	0.79551	0.401087	50.4189	0.68	0.56	0.89	1.31e-12
PFUdA	0.0772414	0.0323923	41.9365	0.069	0.0555324	0.10886	0.0985714	0.200811	203.721	0	0	0.14	0.000909
PFTrDA	0.00137931	0.00515761	373.927	0	0	0	0	0	NA	0	0	0	*
PFBS	0.03	0.03	100	0.0292333	0	0.0437789	0	0	NA	0	0	0	*
PFHxS	2.46345	2.4068	97.7006	1.67466	1.08485	2.44501	3.44286	2.27376	66.0427	3.06	1.7	4	0.00343
PFOS	3.20345	1.64227	51.2657	2.5912	1.94593	4.45738	12.8457	6.65734	51.8254	11.58	7.79	17.03	4.27e-16
6:2 FTS	0.000344828	0.00185695	538.516	0	0	0	0	0	NA	0	0	0	*
GenX	0.000344828	0.00185695	538.516	0	0	0	0	0	NA	0	0	0	*
Sum	8.68414	8.19088	94.32	6.25692	5.49443	9.23928	27.8445	15.8667	56.9832	25.7	18.47	32.1	3.53e-13
									* Detected in < 3 samples in a group
									ns Not Significant
	Firefighter	Drinking Water	Total n	Max (ng/mL)	Min (ng/mL)
High (≥20 ng/mL)	1	33	34	90.26	20.35
Low (<20 ng/mL)	28	16	44	19.10	3.12
Based on PFOA, PFNA, PFDA, PFUdA, PFHxS, and PFOS

[truncated: 9 more sheets: Table S10, Table S11, Table S12, Table S13, Table S14, Table S15, Table S16, Table S17, Table S18]
